# Supplementary material for: Comparison of AAV-Mediated Optogenetic Vision Restoration between Retinal Ganglion Cell Expression and ON Bipolar Cell Targeting
Source: PubMed Central journal article supplement — Mol Ther Methods Clin Dev. 2020 May 22;18:15–23. doi: 10.1016/j.omtm.2020.05.009 (PMC7287188; doi:10.1016/j.omtm.2020.05.009), 2020-05-22
Supplement: mmc1.pdf [file mmc1.pdf]

**OMTM, Volume 18**

**Supplemental Information**

**Comparison of AAV-Mediated Optogenetic Vision**

**Restoration between Retinal Ganglion Cell**

**Expression and ON Bipolar Cell Targeting**

**Qi Lu, Tushar H. Ganjawala, Andrea Krstevski, Gary W. Abrams, and Zhuo-Hua Pan**

## SUPPLEMENTARY MATERIAL

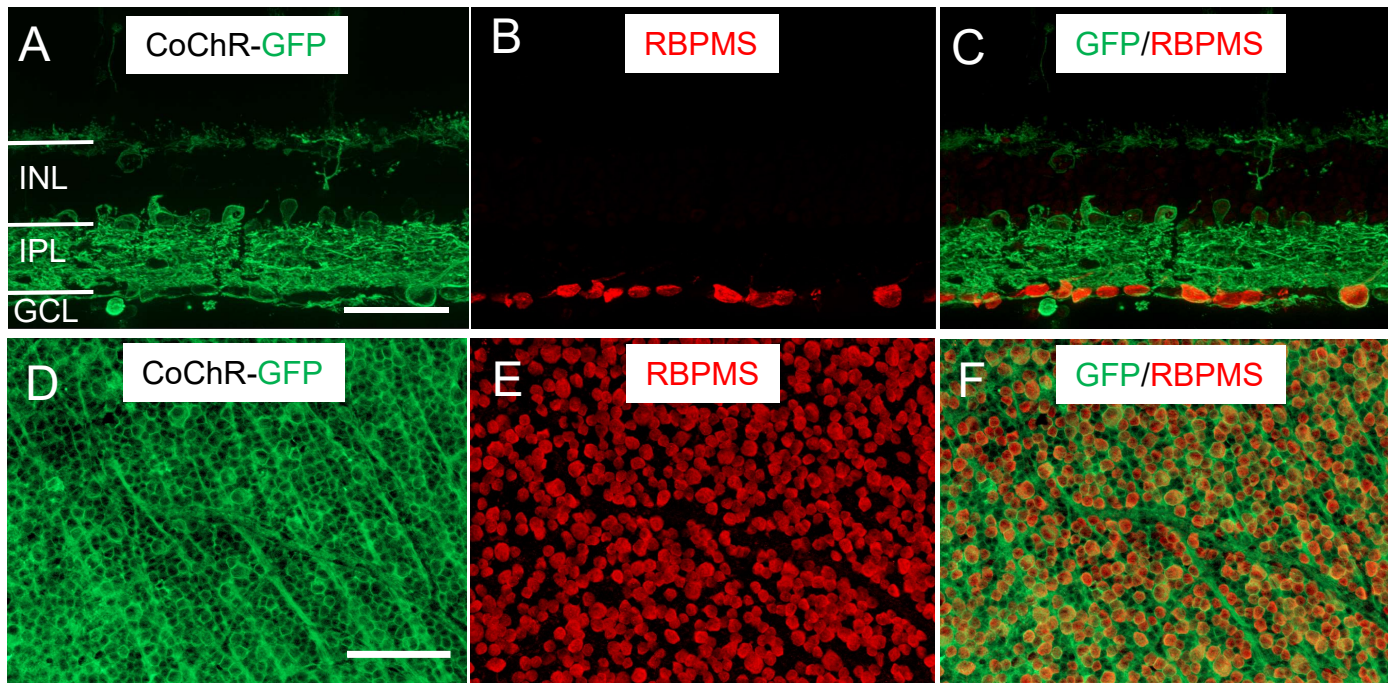

**Figure S1. Expression of CoChR-GFP following ubiquitous RGC expression**  
Representative immunofluorescence images show the co-labeling of GFP (green) and RBPMS (red) in retinal vertical sections (A–C) and retinal whole mounts (D–F). RBPMS is an RGC-specific marker. GFP expression was observed in the vast majority of RGCs, many amacrine cells, and some horizontal cells, as evidenced in retinal vertical sections (C). The vast majority of RGCs were transduced by virus vectors based on the co-labeling of GFP and RBPMS in retinal whole mounts (F). The images of retinal whole mounts were captured with the focal plane in the retinal ganglion cell layer. Scale bars, 50  $\mu\text{m}$  (A–C) and 100  $\mu\text{m}$  (D–F).
